# Supplementary material
Source: MDPI journal article supplement (https://www.mdpi.com/2071-1050/14/12/7226)
Supplement: s1 [file s1]

## Does the impact of technology on students sustain academic, satisfaction, and functional performance: An analysis via interactive and self-regulated learning?

Dear Respondent,

I am working as a post-doctorate fellow in the Advanced Innovation Center for Future Education of Beijing Normal University. I am researching the topic mentioned above. The data collected via questionnaire will be used only for research purposes. Your record and details will not be disclosed to the public. Please pay full attention to fill the questionnaire, I will be thanked.

Regards: Muhammad Qasim Memon  
memon\_kasim@usms.edu.pk

***Please circle one of the following according to your personal information.***

1. The program you are currently enrolled in?  
a) O-level/SSC      b) A-level/FSC      c) Bachelor      d) Diploma certificate  
e) Masters      f) Ph.D.
2. Which country/continent you belong to?  
a) China      b) Pakistan      c) African-continent      d) European-continent      f) American-continent  
g) other

***Circle the options based the given information.***

3. I try to seek the information resources to help in my studies/research  
a) Strongly Disagree      b) Disagree      c) Neutral      d) Agree      e) Strongly Agree
4. I contribute in social and extracurricular activities in university/school.  
a) Strongly Disagree      b) Disagree      c) Neutral      d) Agree      e) Strongly Agree
5. I use different online learning management system for learning new courses to understand the concepts better.  
a) Strongly Disagree      b) Disagree      c) Neutral      d) Agree      e) Strongly Agree
6. I often admired by my friends when I receive good grades or good results  
a) Strongly Disagree      b) Disagree      c) Neutral      d) Agree      e) Strongly Agree
7. My parents possess high expectation from me to do well in my studies  
a) Strongly Disagree      b) Disagree      c) Neutral      d) Agree      e) Strongly Agree
8. During class, teachers pose questions and immediately collect and view the responses using clickers technology  
a) Strongly Disagree      b) Disagree      c) Neutral      d) Agree      e) Strongly Agree
9. Teacher provides with interactive computer simulation or online games to let students play with concepts and ideas before learning about them in class.  
a) Strongly Disagree      b) Disagree      c) Neutral      d) Agree      e) Strongly Agree
10. Enhanced learning IoT devices provide students with interactive learning  
a) Strongly Disagree      b) Disagree      c) Neutral      d) Agree      e) Strongly Agree
